# Supplementary material
Source: Royal Society of Chemistry journal article supplement (https://www.rsc.org/suppdata/cc/1999/2413/907563a.doc)
Supplement: Supplementary file 1 [file 907563a.doc]

**Supplementary** **data**

**A** **cylindrical** **cavity** **with** **two** **different** **hydrogen**-**binding** **boundaries**: **the** **calix**[**4**]**arene** **skeleton** **screwed** **onto** **the** ***meso***-**positions** **of** **the** **calix**[**4**]**pyrrole**

**L**. **Bonomo**,***a*** **E**. **Solari**,***a*** **G**. **Toraman**,***a*** **R**. **Scopelliti**,***a*** **M**. **Latronico*b*** **and** **C**. **Floriani******a***

*a* *Institut* *de* *Chimie* *Minérale* *et* *Analytique*, *BCH*, *Université* *de* *Lausanne*, *CH*-*1015* *Lausanne*, *Switzerland*. *E*-*mail*: *carlo*.*floriani@icma*.*unil*.*ch*

*b Dipartimento di Ingegneria e Fisica dell’Ambiente, Università della Basilicata, I-85100 Potenza, Italy*

**Synthesis and analytical data of 1–3**

**Synthesis** **of** **1**. Methanesulfonic acid (10 mL) was added to a solution of *p*-hydroxyacetophenone (80 g, 0.588 mol) and pyrrole (40 mL, 0.588 mol) in MeOH (200 mL). The reaction was refluxed for 3 h and then quenched with water (700 mL). A yellow solid precipitated, which was collected and dissolved in Et2O (400 mL). A black residue was filtered off and the solution was evaporated to dryness to give a light pink powder, which was dried in *vacuo* (10−7 Mbar) at 90 °C for 24 h (65.3 g, 60%). Anal. Calcd for **1**, C48H44N4O4: C, 77.8; H, 5.99; N, 7.56. Found: C, 76.9; H, 5.25; N, 6.91. 1H NMR spectrum of this powder showed a mixture of the three isomers **1a**, **1b**, **1c** in 7:2:1 ratio. Each isomer was isolated by flash chromatography (FC,CH2Cl2/ *n*-hexane/ MeOH 8:1.4:0.6). All the fractions were dried in *vacuo* (10−7 Mbar ) at 90 °C for 24 h. The first fraction (Rf = 0.332 (UV)) contained the isomer **1c**. Anal. Calcd for **1c**, C48H44N4O4: C, 77.8; H, 5.99; N, 7.56. Found: C, 77.6; H, 6.12; N, 7.48.1H NMR (d6-acetone, 400 MHz, 298 K, ppm): δ 8.88 (s broad, 2H, NH); 8.69 (s broad,2H, NH); 8.24 (s, 4H, OH); 6.85 (d, *J*=8.8 Hz, 8H, ArH); 6.64 (d, *J*=8.8 Hz, 8H, ArH); 5.91 (d, *J*=2.45 Hz, 4H, C4H2N); 5.65 (d, *J*=2.45 Hz, 4H, C4H2N); 1.79 (s, 12H, CH3). The second fraction (Rf=0.271 (UV)) gave the isomer **1b**. Anal. Calcd for **1b**, C48H44N4O4: C, 77.8; H, 5.99; N, 7.56. Found: C, 76.5; H, 5.23; N, 7.13.1H NMR (d6-acetone, 400 MHz, 298 K, ppm): δ 9.23 (s broad, 2H, NH); 8.89 (s broad, 2H, NH); 8.26 (s,2H, OH); 8.22 (s, 1H, OH); 8.20 (s, 1H, OH); 7.25 (d, *J*=8.8 Hz, 2H, ArH), 6.89 (d, *J*=8.8 Hz, 2H, ArH); 6.83 (d, *J*=8.8 Hz, 4H, ArH); 6.76 (d, *J*=8.8 Hz, 4H, ArH); 6.70(d, *J*=8.8 Hz, 2H, ArH); 6.68 (d, *J*=8.8 Hz, 2H, ArH); 6.08 (t, *J*=2.93 Hz, 2H, C4H2N); 5.89 (t, *J*=2.93 Hz, 2H, C4H2N); ); 5.47 (t, *J*=2.93 Hz, 2H, C4H2N); ); 5.40 (t, *J*=2.93 Hz, 2H, C4H2N); 1.87 (s, 3H, CH3); 1.85 (s, 6H, CH3) 1.72 (s, 3H, CH3). The third fraction (Rf=0.193 (UV)) contained the major isomer, **1a**. Anal. Calcd for **1a**, C48H44N4O4: C, 77.8; H, 5.99; N, 7.56. Found: C, 77.72; H, 6.04; N, 7.65.1H NMR (d6-acetone, 400 MHz, 298 K, ppm): δ 8.74 (s broad, 4H, NH); 8.15(s broad, 4H, OH); 6.76 (d, *J*=8.8 Hz, 8H, ArH); 6.65 (d, *J*=8.8 Hz, 8H, ArH); 5.94 (d, *J*=2.45 Hz, 8H, C4H2N); 1.8 (s, 12H, CH3). The major isomer **1a** was also isolated by crystallization of the isomeric mixture from acetic acid. Thirty grams of this powder were dissolved in hot acetic acid (80 mL) and the crystalline white solid which precipitated by cooling was collected, washed with *n*-hexane (3x100 mL) and dried in *vacuo* (19.4 g, 59%). Crystals suitable for x-ray diffraction were grown in a mixture of THF/CH3COOH Anal. Calcd for C48H44N4O4.CH3COOH: C, 74.98; H, 6.04; N, 6.99. Found: C, 75.04; H, 5.98; N, 7.24. 1H NMR (d8-thf, 200 MHz, 298 K, ppm): δ 8.35 (s broad, 4H, NH); 6.90 (d, *J*=8.8 Hz, 8H, ArH), 6.56 (d, *J*=8.8 Hz, 8H, ArH); 5.63 (d, *J*=2.45 Hz, 8H, C4H2N); 1.88 (s, 12H, CH3 overlapping with s, 3H, CH3COOH). Acetic acid elimination was carried out by azeotropic distillation with butylether.

**Synthesis** **of** **2**. Methanesulfonic acid (10 mL) was added to a solution of *m*-hydroxyacetophenone (80 g, 0.588 mol) and pyrrole (40 mL, 0.588 mol) in MeOH (200 mL). The reaction was refluxed for 3 h and then quenched with water (700 mL). A light brown solid precipitated, which was collected and dissolved in ether (400 mL). A black residue was filtered off and the solution was evaporated to dryness to give a white powder, which was dried in *vacuo* (10−7 Mbar) at 90 °C for 24 h (65.3 g, 60%). 1H NMR spectrum of this powder showed a mixture of three isomers **2a**, **2b**, **2c** in a ratio of 75:20:5. The major isomer **2a** was isolated by crystallization of the isomeric mixture from chlorobenzene. Sixty grams of this powder were refluxed for 5 h in chlorobenzene (300 mL) to obtain a white solid which was collected, washed with *n*-hexane (3x100 mL) and dried in *vacuo* (38 g, 63%). Colorless crystals were obtained in acetone, nitrobenzene, acetic acid and acetonitrile. Anal. Calcd for **2a**, C48H44N4O4: C, 77.8; H, 5.99; N, 7.56. Found: C, 77.2; H, 5.52; N, 6.83. 1H NMR (d6-acetone, 400 MHz, 298 K, ppm): δ 8.79 (s broad, 4H, NH); 8.14 (s broad, 4H, OH); 7.03 (d, *J*=7.8 Hz, 4H, ArH); 6.63 (s, 4H, ArH), 6.55 (m, 8H, ArH); 6.01 (d, *J*=2.45 Hz, 8H, C4H2N); 1.85 (s, 12H, CH3).

**Synthesis** **of** **3**. Compound **1a** (10.0 g, 13.5 mmol) was dissolved in phenylisocyanate (50 mL) at room temperature and on anhydrous conditions. The reaction was stirred for 12 h and then *n*-hexane (300 mL) was added. A white solid precipitated, which was collected and recrystallized from Et2O/*n*-hexane (12.3 g, 75%). Anal. Calcd for **3**, C76H64N8O8: C, 74.98; H, 5.30; N, 9.20. Found: C, 75.12; H, 5.32; N, 9.03 1H NMR (C6D6, 400 MHz, 298 K, ppm): δ 7.59 (s broad, 4H, NH); 7.2-7.0 (m, 36H, ArH); 6.32 (s broad, 4H, NH); 5.95 (d, *J*=2.45 Hz, 8H, C4H2N); 1.88 (s, 12H, CH3). Five grams of this product were recrystallized from acetone to give a crystalline white solid, which was washed with *n*-hexane (3x30 mL) and dried in *vacuo* (3.13 g, 50%). Anal. Calcd for C76H64N8O8.5CH3COCH3: C, 72.49; H, 6.28; N, 7.43. Found: C, 72.08; H, 6.37; N, 6.95 1H NMR (C6D6, 400 MHz, 298 K, ppm): δ 7.92 (s broad, 4H, NH); 7.3-6.9 (m, 36H, ArH); 6.24 (s broad, 4H, NH); 6.0 (d, *J*=2.45 Hz, 8H, C4H2N); 1.88 (s, 12H, CH3); 1.45 (s, 30H, CH3).
